# Supplementary material for: Synthesis and characterization of UV upconversion material Y2SiO5:Pr3+, Li+/TiO2 with enhanced the photocatalytic properties under a xenon lamp
Source: Royal Society of Chemistry journal article supplement (doi:10.1039/c5ra06416c), 2015-01-01
Supplement: c5ra06416c1.pdf [file c5ra06416c1.pdf]

## Electronic Supplementary information

### Synthesis and characterization of UV upconversion material

### $\text{Y}_2\text{SiO}_5: \text{Pr}^{3+}, \text{Li}^+ / \text{TiO}_2$ with enhanced the photocatalytic properties under a xenon lamp

Jianhong Wu, Yanmin Yang\*, Zhiren Wei, Boning Han, Jun Wei

*The Midwest universities comprehensive strength promotion project, Hebei Key Lab of Optic-electronic Information and Materials, College of Physics Science and Technology, Hebei University, Baoding 071002, China*

\*Corresponding author. Fax & Tel.: 86 159 3028 4830

Email address: [mihuyym@163.com](mailto:mihuyym@163.com)

Figure S1. XRD patterns of  $\text{Y}_2\text{SiO}_5: \text{Pr}^{3+}$  upconversion materials (the  $\text{Pr}^{3+}$  concentration was 1.2%) calcined by different temperature (a) Un-doped with  $\text{Li}^+$ ; (b) Co-doped with 9%  $\text{Li}^+$ .

Figure S2. XRD patterns of  $\text{Y}_2\text{SiO}_5: \text{Pr}^{3+}$  microcrystals doped with different  $\text{Li}^+$  concentration ( $\text{Y}_2\text{SiO}_5: \text{Pr}^{3+}$  was calcined by 1100°C for 4h,  $\text{Pr}^{3+}$  concentration was 1.2%).

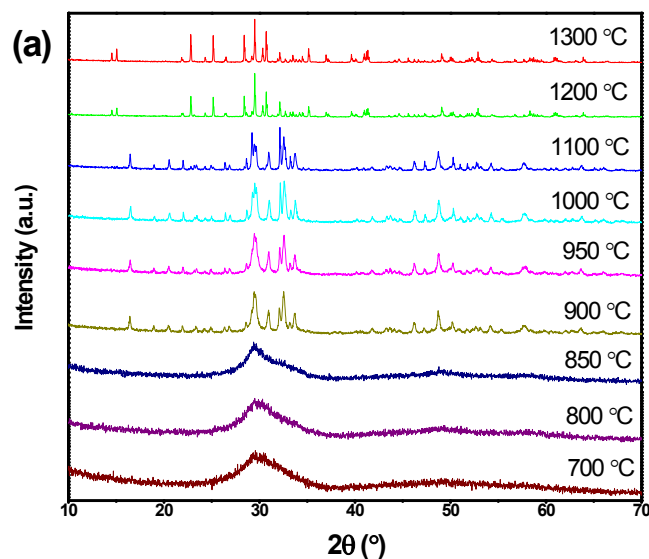

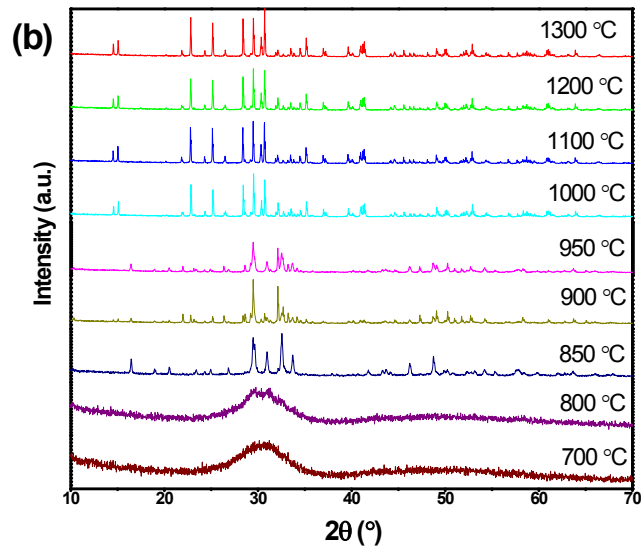

Figure S1. XRD patterns of  $\text{Y}_2\text{SiO}_5:\text{Pr}^{3+}$  upconversion materials (the  $\text{Pr}^{3+}$  concentration was 1.2%) calcined by different temperature (a) Un-doped with  $\text{Li}^+$ ; (b) Co-doped with 9%  $\text{Li}^+$ .

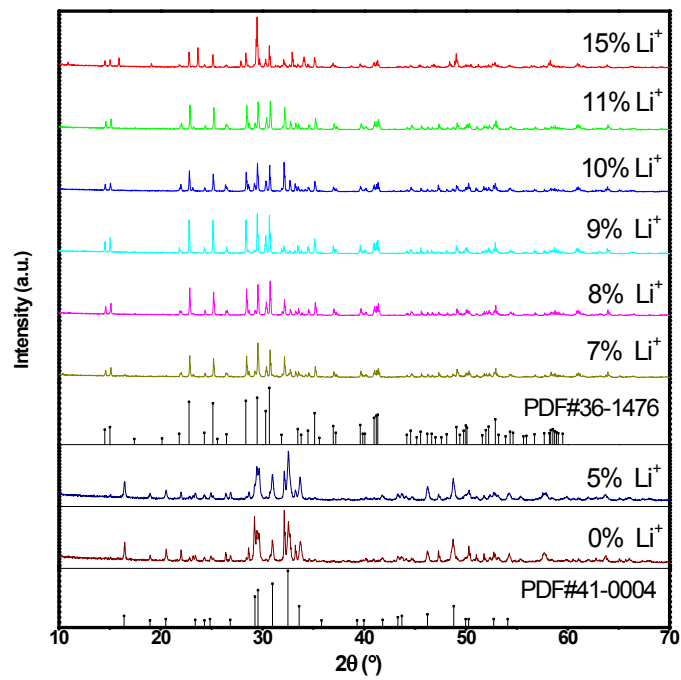

Figure S2. XRD patterns of  $\text{Y}_2\text{SiO}_5:\text{Pr}^{3+}$  microcrystals doped with different  $\text{Li}^+$  concentration ( $\text{Y}_2\text{SiO}_5:\text{Pr}^{3+}$  was calcined by 1100 $^\circ\text{C}$  for 4h,  $\text{Pr}^{3+}$  concentration was 1.2%).
